# Supplementary material
Source: Springer Nature journal article supplement (https://www.springermedizin.de/resource/supplementary/12875_2011_649_MOESM1_ESM.pdf/9434866)

Proportion of patients without Diabetes Mellitus

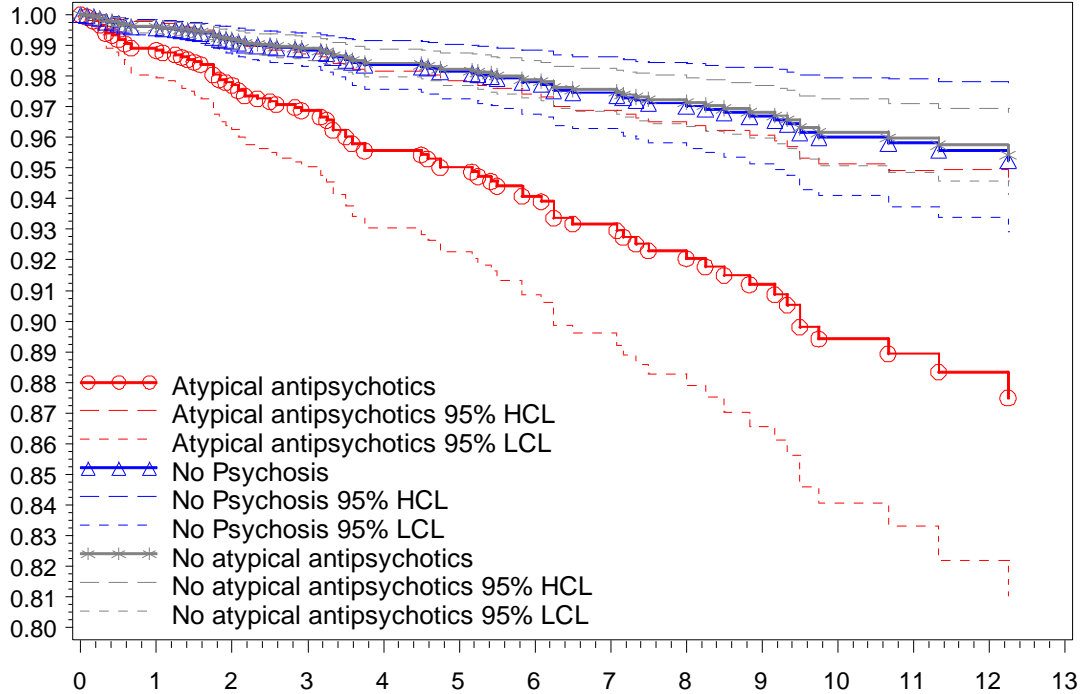

Time to Diabetes Mellitus (in years)

Supplement: MOESM1 [file 9434866]
